# Supplementary material
Source: publisher figshare collection journal article supplement (https://acs.figshare.com/ndownloader/files/4216051)
Supplement: Supplementary file 1 [file 4216051]

#=======================================================================
data_global

_audit_update_record
;
2011-04-15 # Formatted by publCIF
;
#=======================================================================

_audit_creation_method                   'Jana2006 Version : 09/03/2011'


# 1. PROCESSING SUMMARY (IUCr Office Use Only)

_journal_date_recd_electronic            ?
_journal_date_to_coeditor                ?
_journal_date_from_coeditor              ?
_journal_date_accepted                   ?
_journal_date_printers_first             ?
_journal_date_printers_final             ?
_journal_date_proofs_out                 ?
_journal_date_proofs_in                  ?
_journal_coeditor_name                   ?
_journal_coeditor_code                   ?
_journal_coeditor_notes
?
_journal_techeditor_code                 ?
_journal_paper_category                  ?
_journal_techeditor_notes
?
_journal_coden_ASTM                      ?
_journal_name_full                       'Acta Crystallographica Section C'
_journal_year                            ?
_journal_volume                          ?
_journal_issue                           ?
_journal_page_first                      ?
_journal_page_last                       ?
_journal_suppl_publ_number               ?
_journal_suppl_publ_pages                ?

#=======================================================================

# 2. SUBMISSION DETAILS

_publ_contact_author_name                ?
_publ_contact_author_address
?
_publ_contact_author_email               ?
_publ_contact_author_fax                 ?
_publ_contact_author_phone               ?

_publ_requested_journal                  'Acta Crystallographica Section C'
_publ_requested_category                 ?

_publ_contact_letter
?

#=======================================================================

# 3. TITLE AND AUTHOR LIST

_publ_section_title
;
Title (type here to add)
;

_publ_section_title_footnote
.
loop_
 _publ_author_name
 _publ_author_footnote
 _publ_author_address
 ?       # name
; ?      # footnote
;
; ?      # address
;

#=======================================================================

# 4. TEXT

_publ_section_synopsis
.
_publ_section_abstract
;
(type here to add abstract)
;

_publ_section_comment
;
(type here to add)
;

_publ_section_introduction
?
_publ_section_experimental
?
_publ_section_exptl_prep
;
(type here to add preparation details)
;

_publ_section_exptl_refinement
;
(type here to add refinement details)
;

_publ_section_exptl_solution
?
_publ_section_discussion
?
_publ_section_acknowledgements
;
(type here to add acknowledgements)
;

_publ_section_references
;
Petricek, V., Dusek, M. & Palatinus, L. (2006). Jana2006. Structure
Determination Software Programs. Institute of Physics, Praha, Czech Republic.

Palatinus, L. & Chapuis, G. (2007). <i>J. Appl. Cryst.</i> <b>40</b>, 786--790.

# enable this reference if Diamond ver. 2 was used for visualization
#Brandenburg, K. (1999). <i>DIAMOND</i>. Version. 2.1c. #Crystal Impact GbR,
Bonn, Germany.

# enable this reference if Diamond ver. 3 was used for visualization
#Brandenburg, K. & Putz, H. (2005). <i>DIAMOND</i> Version 3. #Crystal Impact
GbR, Postfach 1251, D-53002 Bonn, Germany.

# enable this reference if <i>SIR97</i> was used for solving of the structure
#Altomare, A., Burla, M. C., Camalli, M., Cascarano, G., Giacovazzo, C.,
#Guagliardi, A., Moliterni, A. G. G., Polidori, G., Spagna, R. (1997).
#<i>SIR97</i>. A Package for Crystal Structure Solution by Direct Methods #and
Refinement, Bari, Rome, Italy.

# use this reference if <i>SIR2002</i> was used for solving of the structure
#Burla, M.C., Camalli, M., Carrozzini, B., Cascarano, G., Giacovazzo, C.,
#Polidori, G., Spagna, R. #<i>SIR2002</i>: the program, J. Appl. Cryst,
(2003). <i>36</i>, 1103.

# enable this reference if bond valences were calculated #Brown, I. D. (1996).
<i>J. Appl. Cryst.</i> <b>29</b>, 479--480.

# enable this reference if <i>X-SHAPE</i> wase used for crystal shape
refinement #Stoe & Cie (1998). <i>X-SHAPE</i>. Stoe & Cie, Darmstadt, Germany.

# enable this reference if Flack coefficient was refined #Flack, H. D. (1983).
<i>Acta Cryst.</i> A<b>39</b>, 876--881.
;
_publ_section_figure_captions
;

;

_publ_section_table_legends
?

#=======================================================================
data_I
#=======================================================================

# 5. CHEMICAL DATA

_chemical_name_systematic
?
_chemical_name_common                    ?
_chemical_formula_moiety                 'Al0.293 In2.373 S4'
_chemical_formula_structural             ?
_chemical_formula_analytical             ?
_chemical_formula_iupac                  ?
_chemical_formula_sum                    'Al0.293 In2.373 S4'
_chemical_formula_weight                 408.6
_chemical_melting_point                  ?
_chemical_compound_source                ?
_chemical_absolute_configuration         .

#=======================================================================

# 6. CRYSTAL DATA

_symmetry_cell_setting                   cubic
_symmetry_space_group_name_H-M           'F d -3 m'
_symmetry_space_group_name_Hall          '-F 4vw 2vw 3'
_symmetry_Int_Tables_number              227
loop_
 _symmetry_equiv_pos_site_id
 _symmetry_equiv_pos_as_xyz
 1   x,y,z
 2   -x+3/4,-y+1/4,z+1/2
 3   -x+1/4,y+1/2,-z+3/4
 4   x+1/2,-y+3/4,-z+1/4
 5   z,x,y
 6   z+1/2,-x+3/4,-y+1/4
 7   -z+3/4,-x+1/4,y+1/2
 8   -z+1/4,x+1/2,-y+3/4
 9   y,z,x
 10  -y+1/4,z+1/2,-x+3/4
 11  y+1/2,-z+3/4,-x+1/4
 12  -y+3/4,-z+1/4,x+1/2
 13  y+3/4,x+1/4,-z+1/2
 14  -y,-x,-z
 15  y+1/4,-x+1/2,z+3/4
 16  -y+1/2,x+3/4,z+1/4
 17  x+3/4,z+1/4,-y+1/2
 18  -x+1/2,z+3/4,y+1/4
 19  -x,-z,-y
 20  x+1/4,-z+1/2,y+3/4
 21  z+3/4,y+1/4,-x+1/2
 22  z+1/4,-y+1/2,x+3/4
 23  -z+1/2,y+3/4,x+1/4
 24  -z,-y,-x
 25  -x,-y,-z
 26  x+1/4,y+3/4,-z+1/2
 27  x+3/4,-y+1/2,z+1/4
 28  -x+1/2,y+1/4,z+3/4
 29  -z,-x,-y
 30  -z+1/2,x+1/4,y+3/4
 31  z+1/4,x+3/4,-y+1/2
 32  z+3/4,-x+1/2,y+1/4
 33  -y,-z,-x
 34  y+3/4,-z+1/2,x+1/4
 35  -y+1/2,z+1/4,x+3/4
 36  y+1/4,z+3/4,-x+1/2
 37  -y+1/4,-x+3/4,z+1/2
 38  y,x,z
 39  -y+3/4,x+1/2,-z+1/4
 40  y+1/2,-x+1/4,-z+3/4
 41  -x+1/4,-z+3/4,y+1/2
 42  x+1/2,-z+1/4,-y+3/4
 43  x,z,y
 44  -x+3/4,z+1/2,-y+1/4
 45  -z+1/4,-y+3/4,x+1/2
 46  -z+3/4,y+1/2,-x+1/4
 47  z+1/2,-y+1/4,-x+3/4
 48  z,y,x
 49  x,y+1/2,z+1/2
 50  -x+3/4,-y+3/4,z
 51  -x+1/4,y,-z+1/4
 52  x+1/2,-y+1/4,-z+3/4
 53  z,x+1/2,y+1/2
 54  z+1/2,-x+1/4,-y+3/4
 55  -z+3/4,-x+3/4,y
 56  -z+1/4,x,-y+1/4
 57  y,z+1/2,x+1/2
 58  -y+1/4,z,-x+1/4
 59  y+1/2,-z+1/4,-x+3/4
 60  -y+3/4,-z+3/4,x
 61  y+3/4,x+3/4,-z
 62  -y,-x+1/2,-z+1/2
 63  y+1/4,-x,z+1/4
 64  -y+1/2,x+1/4,z+3/4
 65  x+3/4,z+3/4,-y
 66  -x+1/2,z+1/4,y+3/4
 67  -x,-z+1/2,-y+1/2
 68  x+1/4,-z,y+1/4
 69  z+3/4,y+3/4,-x
 70  z+1/4,-y,x+1/4
 71  -z+1/2,y+1/4,x+3/4
 72  -z,-y+1/2,-x+1/2
 73  -x,-y+1/2,-z+1/2
 74  x+1/4,y+1/4,-z
 75  x+3/4,-y,z+3/4
 76  -x+1/2,y+3/4,z+1/4
 77  -z,-x+1/2,-y+1/2
 78  -z+1/2,x+3/4,y+1/4
 79  z+1/4,x+1/4,-y
 80  z+3/4,-x,y+3/4
 81  -y,-z+1/2,-x+1/2
 82  y+3/4,-z,x+3/4
 83  -y+1/2,z+3/4,x+1/4
 84  y+1/4,z+1/4,-x
 85  -y+1/4,-x+1/4,z
 86  y,x+1/2,z+1/2
 87  -y+3/4,x,-z+3/4
 88  y+1/2,-x+3/4,-z+1/4
 89  -x+1/4,-z+1/4,y
 90  x+1/2,-z+3/4,-y+1/4
 91  x,z+1/2,y+1/2
 92  -x+3/4,z,-y+3/4
 93  -z+1/4,-y+1/4,x
 94  -z+3/4,y,-x+3/4
 95  z+1/2,-y+3/4,-x+1/4
 96  z,y+1/2,x+1/2
 97  x+1/2,y,z+1/2
 98  -x+1/4,-y+1/4,z
 99  -x+3/4,y+1/2,-z+1/4
 100 x,-y+3/4,-z+3/4
 101 z+1/2,x,y+1/2
 102 z,-x+3/4,-y+3/4
 103 -z+1/4,-x+1/4,y
 104 -z+3/4,x+1/2,-y+1/4
 105 y+1/2,z,x+1/2
 106 -y+3/4,z+1/2,-x+1/4
 107 y,-z+3/4,-x+3/4
 108 -y+1/4,-z+1/4,x
 109 y+1/4,x+1/4,-z
 110 -y+1/2,-x,-z+1/2
 111 y+3/4,-x+1/2,z+1/4
 112 -y,x+3/4,z+3/4
 113 x+1/4,z+1/4,-y
 114 -x,z+3/4,y+3/4
 115 -x+1/2,-z,-y+1/2
 116 x+3/4,-z+1/2,y+1/4
 117 z+1/4,y+1/4,-x
 118 z+3/4,-y+1/2,x+1/4
 119 -z,y+3/4,x+3/4
 120 -z+1/2,-y,-x+1/2
 121 -x+1/2,-y,-z+1/2
 122 x+3/4,y+3/4,-z
 123 x+1/4,-y+1/2,z+3/4
 124 -x,y+1/4,z+1/4
 125 -z+1/2,-x,-y+1/2
 126 -z,x+1/4,y+1/4
 127 z+3/4,x+3/4,-y
 128 z+1/4,-x+1/2,y+3/4
 129 -y+1/2,-z,-x+1/2
 130 y+1/4,-z+1/2,x+3/4
 131 -y,z+1/4,x+1/4
 132 y+3/4,z+3/4,-x
 133 -y+3/4,-x+3/4,z
 134 y+1/2,x,z+1/2
 135 -y+1/4,x+1/2,-z+3/4
 136 y,-x+1/4,-z+1/4
 137 -x+3/4,-z+3/4,y
 138 x,-z+1/4,-y+1/4
 139 x+1/2,z,y+1/2
 140 -x+1/4,z+1/2,-y+3/4
 141 -z+3/4,-y+3/4,x
 142 -z+1/4,y+1/2,-x+3/4
 143 z,-y+1/4,-x+1/4
 144 z+1/2,y,x+1/2
 145 x+1/2,y+1/2,z
 146 -x+1/4,-y+3/4,z+1/2
 147 -x+3/4,y,-z+3/4
 148 x,-y+1/4,-z+1/4
 149 z+1/2,x+1/2,y
 150 z,-x+1/4,-y+1/4
 151 -z+1/4,-x+3/4,y+1/2
 152 -z+3/4,x,-y+3/4
 153 y+1/2,z+1/2,x
 154 -y+3/4,z,-x+3/4
 155 y,-z+1/4,-x+1/4
 156 -y+1/4,-z+3/4,x+1/2
 157 y+1/4,x+3/4,-z+1/2
 158 -y+1/2,-x+1/2,-z
 159 y+3/4,-x,z+3/4
 160 -y,x+1/4,z+1/4
 161 x+1/4,z+3/4,-y+1/2
 162 -x,z+1/4,y+1/4
 163 -x+1/2,-z+1/2,-y
 164 x+3/4,-z,y+3/4
 165 z+1/4,y+3/4,-x+1/2
 166 z+3/4,-y,x+3/4
 167 -z,y+1/4,x+1/4
 168 -z+1/2,-y+1/2,-x
 169 -x+1/2,-y+1/2,-z
 170 x+3/4,y+1/4,-z+1/2
 171 x+1/4,-y,z+1/4
 172 -x,y+3/4,z+3/4
 173 -z+1/2,-x+1/2,-y
 174 -z,x+3/4,y+3/4
 175 z+3/4,x+1/4,-y+1/2
 176 z+1/4,-x,y+1/4
 177 -y+1/2,-z+1/2,-x
 178 y+1/4,-z,x+1/4
 179 -y,z+3/4,x+3/4
 180 y+3/4,z+1/4,-x+1/2
 181 -y+3/4,-x+1/4,z+1/2
 182 y+1/2,x+1/2,z
 183 -y+1/4,x,-z+1/4
 184 y,-x+3/4,-z+3/4
 185 -x+3/4,-z+1/4,y+1/2
 186 x,-z+3/4,-y+3/4
 187 x+1/2,z+1/2,y
 188 -x+1/4,z,-y+1/4
 189 -z+3/4,-y+1/4,x+1/2
 190 -z+1/4,y,-x+1/4
 191 z,-y+3/4,-x+3/4
 192 z+1/2,y+1/2,x
_cell_length_a                           10.6990(7)
_cell_length_b                           10.6990(7)
_cell_length_c                           10.6990(7)
_cell_angle_alpha                        90
_cell_angle_beta                         90
_cell_angle_gamma                        90
_cell_volume                             1224.70(14)

loop_
 _jana_cell_twin_matrix_id
 _jana_cell_twin_volume_fraction
 _jana_cell_twin_matrix_1_1
 _jana_cell_twin_matrix_1_2
 _jana_cell_twin_matrix_1_3
 _jana_cell_twin_matrix_2_1
 _jana_cell_twin_matrix_2_2
 _jana_cell_twin_matrix_2_3
 _jana_cell_twin_matrix_3_1
 _jana_cell_twin_matrix_3_2
 _jana_cell_twin_matrix_3_3
 ? ? ? ? ? ? ? ? ? ? ?
_cell_formula_units_Z                    8

_cell_measurement_reflns_used            ?
_cell_measurement_theta_min              ?
_cell_measurement_theta_max              ?
_cell_measurement_temperature            293
_cell_special_details
?

_exptl_crystal_density_diffrn            4.4308
_exptl_crystal_density_meas              ?
_exptl_crystal_density_method            ?
_exptl_crystal_F_000                     1473

_exptl_absorpt_coefficient_mu            10.161
_exptl_crystal_description               block
_exptl_crystal_size_max                  0.200
_exptl_crystal_size_mid                  0.180
_exptl_crystal_size_min                  0.120
_exptl_crystal_size_rad                  0.100
_exptl_crystal_colour                    ?
_exptl_absorpt_correction_type           gaussian
_exptl_absorpt_process_details
 'Jana2006  (Petricek, Dusek & Palatinus, 2000)'
_exptl_absorpt_correction_T_min          0.2295
_exptl_absorpt_correction_T_max          0.2853

#=======================================================================

# 7. EXPERIMENTAL DATA

_exptl_special_details                   ?

_diffrn_ambient_temperature              293
_diffrn_source                           ?
_diffrn_source_power                     ?
_diffrn_source_voltage                   ?
_diffrn_source_current                   ?
_diffrn_radiation_type                   'Mo K\a'
_diffrn_radiation_source                 'X-ray tube'
_diffrn_radiation_wavelength             0.71069
_diffrn_radiation_monochromator          graphite
_diffrn_measurement_device               'four-cycle diffractometer'
_diffrn_measurement_device_type          'Nonius CCD'
_diffrn_detector                         ?
_diffrn_detector_area_resol_mean         ?
_diffrn_measurement_method               Phi-omega-scan
_diffrn_measurement_specimen_support     ?

_diffrn_reflns_number                    3412
_diffrn_reflns_theta_min                 6.61
_diffrn_reflns_theta_max                 34.85
_diffrn_reflns_theta_full                34.85
_diffrn_measured_fraction_theta_max      0.98
_diffrn_measured_fraction_theta_full     0.98
_diffrn_reflns_av_R_equivalents          0.0836
_diffrn_reflns_av_sigmaI/netI            0.0201
_diffrn_reflns_limit_h_min               -17
_diffrn_reflns_limit_h_max               9
_diffrn_reflns_limit_k_min               -17
_diffrn_reflns_limit_k_max               13
_diffrn_reflns_limit_l_min               -13
_diffrn_reflns_limit_l_max               15
_diffrn_reflns_reduction_process         ?

_diffrn_standards_number                 ?
_diffrn_standards_interval_count         ?
_diffrn_standards_interval_time          ?
_diffrn_standards_decay_%                ?
loop_
_diffrn_standard_refln_index_h
_diffrn_standard_refln_index_k
_diffrn_standard_refln_index_l
  ? ? ?

#=======================================================================

# 8. REFINEMENT DATA

_refine_special_details
?

_reflns_number_total                     155
_reflns_number_gt                        121
_reflns_threshold_expression             'I>2\s(I)'

_refine_ls_structure_factor_coef         Fsqd
_refine_ls_R_factor_gt                   0.0474
_refine_ls_wR_factor_gt                  0.1086
_refine_ls_R_factor_all                  0.0640
_refine_ls_wR_factor_ref                 0.1144
_refine_ls_goodness_of_fit_ref           1.57
_refine_ls_goodness_of_fit_gt            1.70
_refine_ls_restrained_S_gt               ?
_refine_ls_restrained_S_all              ?
_refine_ls_number_reflns                 155
_refine_ls_number_parameters             8
_refine_ls_number_restraints             0
_refine_ls_number_constraints            4
_refine_ls_weighting_scheme              sigma
_refine_ls_weighting_details             'w=1/(\s^2^(I)+0.001936I^2^)'
_refine_ls_hydrogen_treatment            ?
_refine_ls_shift/su_max                  0.0105
_refine_ls_shift/su_mean                 0.0036
_refine_diff_density_max                 2.66
_refine_diff_density_min                 -2.45
_refine_ls_extinction_method             'none'
_refine_ls_extinction_coef               ?
_refine_ls_abs_structure_details         ?
_refine_ls_abs_structure_Flack           ?
_refine_ls_abs_structure_Rogers          ?

loop_
 _atom_type_symbol
 _atom_type_scat_dispersion_real
 _atom_type_scat_dispersion_imag
 _atom_type_scat_source
 In -0.7276  1.3100
 'International Tables Vol C tables 4.2.6.8 and 6.1.1.1'
 Al  0.0645  0.0514
 'International Tables Vol C tables 4.2.6.8 and 6.1.1.1'
 S   0.1246  0.1234
 'International Tables Vol C tables 4.2.6.8 and 6.1.1.1'

_computing_data_collection
 'unknown'
_computing_cell_refinement
 'unknown'
_computing_data_reduction
 'unknown'
_computing_structure_solution
 'unknown'
_computing_structure_refinement          ?
_computing_molecular_graphics
 'unknown'
_computing_publication_material          ?

#=======================================================================

# 9. ATOMIC COORDINATES AND DISPLACEMENT PARAMETERS

loop_
_atom_site_label
_atom_site_type_symbol
_atom_site_fract_x
_atom_site_fract_y
_atom_site_fract_z
_atom_site_adp_type
_atom_site_U_iso_or_equiv
_atom_site_symmetry_multiplicity
_atom_site_occupancy
_atom_site_calc_flag
_atom_site_refinement_flags
_atom_site_disorder_assembly
_atom_site_disorder_group

 Inoh In 0.5 0.5 0.5 Uani 0.0269(3) 16 0.901(4) d . . .
 Aloh Al 0.5 0.5 0.5 Uani 0.0269(3) 16 0.099(4) d . . .
 Intd In 0.125 0.125 0.125 Uani 0.0147(4) 8 0.572(4) d . . .
 Altd Al 0.125 0.125 0.125 Uani 0.0147(4) 8 0.095(4) d . . .
 S S 0.25678(17) 0.25678(17) 0.25678(17) Uani 0.0193(3) 32 1 d . . .


loop_
 _atom_site_aniso_label
 _atom_site_aniso_type_symbol
 _atom_site_aniso_U_11
 _atom_site_aniso_U_22
 _atom_site_aniso_U_33
 _atom_site_aniso_U_12
 _atom_site_aniso_U_13
 _atom_site_aniso_U_23
 Inoh In 0.0269(5) 0.0269(5) 0.0269(5) -0.0001(4) -0.0001(4) -0.0001(4)
 Aloh Al 0.0269(5) 0.0269(5) 0.0269(5) -0.0001(4) -0.0001(4) -0.0001(4)
 Intd In 0.0147(8) 0.0147(8) 0.0147(8) 0 0 0
 Altd Al 0.0147(8) 0.0147(8) 0.0147(8) 0 0 0
 S S 0.0193(6) 0.0193(6) 0.0193(6) 0.0002(7) 0.0002(7) 0.0002(7)


#=======================================================================

# 10. MOLECULAR GEOMETRY


loop_
 _geom_bond_atom_site_label_1
 _geom_bond_atom_site_label_2
 _geom_bond_site_symmetry_1
 _geom_bond_site_symmetry_2
 _geom_bond_distance
 _geom_bond_publ_flag
  Inoh S . 50_555 2.6043(19) ?
  Inoh S . 147_555 2.6043(19) ?
  Inoh S . 100_555 2.6043(19) ?
  Inoh S . 109_556 2.6043(19) ?
  Inoh S . 63_565 2.6043(19) ?
  Inoh S . 160_655 2.6043(19) ?
  Aloh S . 50_555 2.6043(19) ?
  Aloh S . 147_555 2.6043(19) ?
  Aloh S . 100_555 2.6043(19) ?
  Aloh S . 109_556 2.6043(19) ?
  Aloh S . 63_565 2.6043(19) ?
  Aloh S . 160_655 2.6043(19) ?
  Intd S . . 2.4420(19) ?
  Intd S . 98_555 2.4420(19) ?
  Intd S . 51_555 2.4420(19) ?
  Intd S . 148_555 2.4420(19) ?
  Altd S . . 2.4420(19) ?
  Altd S . 98_555 2.4420(19) ?
  Altd S . 51_555 2.4420(19) ?
  Altd S . 148_555 2.4420(19) ?

loop_
 _geom_angle_atom_site_label_1
 _geom_angle_atom_site_label_2
 _geom_angle_atom_site_label_3
 _geom_angle_site_symmetry_1
 _geom_angle_site_symmetry_2
 _geom_angle_site_symmetry_3
 _geom_angle
 _geom_angle_publ_flag
  S Inoh S 50_555 . 147_555 86.77(6) ?
  S Inoh S 50_555 . 100_555 86.77(6) ?
  S Inoh S 50_555 . 109_556 180.0(5) ?
  S Inoh S 50_555 . 63_565 93.23(6) ?
  S Inoh S 50_555 . 160_655 93.23(6) ?
  S Inoh S 147_555 . 100_555 86.77(6) ?
  S Inoh S 147_555 . 109_556 93.23(6) ?
  S Inoh S 147_555 . 63_565 180.0(5) ?
  S Inoh S 147_555 . 160_655 93.23(6) ?
  S Inoh S 100_555 . 109_556 93.23(6) ?
  S Inoh S 100_555 . 63_565 93.23(6) ?
  S Inoh S 100_555 . 160_655 180.0(5) ?
  S Inoh S 109_556 . 63_565 86.77(6) ?
  S Inoh S 109_556 . 160_655 86.77(6) ?
  S Inoh S 63_565 . 160_655 86.77(6) ?
  S Aloh S 50_555 . 147_555 86.77(6) ?
  S Aloh S 50_555 . 100_555 86.77(6) ?
  S Aloh S 50_555 . 109_556 180.0(5) ?
  S Aloh S 50_555 . 63_565 93.23(6) ?
  S Aloh S 50_555 . 160_655 93.23(6) ?
  S Aloh S 147_555 . 100_555 86.77(6) ?
  S Aloh S 147_555 . 109_556 93.23(6) ?
  S Aloh S 147_555 . 63_565 180.0(5) ?
  S Aloh S 147_555 . 160_655 93.23(6) ?
  S Aloh S 100_555 . 109_556 93.23(6) ?
  S Aloh S 100_555 . 63_565 93.23(6) ?
  S Aloh S 100_555 . 160_655 180.0(5) ?
  S Aloh S 109_556 . 63_565 86.77(6) ?
  S Aloh S 109_556 . 160_655 86.77(6) ?
  S Aloh S 63_565 . 160_655 86.77(6) ?
  S Intd S . . 98_555 109.47(6) ?
  S Intd S . . 51_555 109.47(6) ?
  S Intd S . . 148_555 109.47(6) ?
  S Intd S 98_555 . 51_555 109.47(6) ?
  S Intd S 98_555 . 148_555 109.47(6) ?
  S Intd S 51_555 . 148_555 109.47(6) ?
  S Altd S . . 98_555 109.47(6) ?
  S Altd S . . 51_555 109.47(6) ?
  S Altd S . . 148_555 109.47(6) ?
  S Altd S 98_555 . 51_555 109.47(6) ?
  S Altd S 98_555 . 148_555 109.47(6) ?
  S Altd S 51_555 . 148_555 109.47(6) ?

loop_
 _geom_torsion_atom_site_label_1
 _geom_torsion_atom_site_label_2
 _geom_torsion_atom_site_label_3
 _geom_torsion_atom_site_label_4
 _geom_torsion_site_symmetry_1
 _geom_torsion_site_symmetry_2
 _geom_torsion_site_symmetry_3
 _geom_torsion_site_symmetry_4
 _geom_torsion
 _geom_torsion_publ_flag
 ? ? ? ? ? ? ? ? ? ?

loop_
 _geom_hbond_atom_site_label_D
 _geom_hbond_atom_site_label_H
 _geom_hbond_atom_site_label_A
 _geom_hbond_site_symmetry_D
 _geom_hbond_site_symmetry_H
 _geom_hbond_site_symmetry_A
 _geom_hbond_distance_DH
 _geom_hbond_distance_HA
 _geom_hbond_distance_DA
 _geom_hbond_angle_DHA
 _geom_hbond_publ_flag
 ? ? ? ? ? ? ? ? ? ? ?


#=======================================================================

# 11. STRUCTURE-FACTOR LIST

loop_
 _refln_index_h
 _refln_index_k
 _refln_index_l
 _refln_F_squared_calc
 _refln_F_squared_meas
 _refln_F_squared_sigma
 _refln_observed_status
   2   2   2    40550.15    34697.16    357.52 o
   3   3   1    10623.22    10726.97    152.63 o
   3   3   3    87438.49    88170.58    760.94 o
   4   0   0   505089.72   490592.31   1503.22 o
   4   2   2    27032.74    26051.20    232.35 o
   4   4   0   769612.38   802298.00   1809.99 o
   4   4   2       68.32     1483.23    152.85 o
   4   4   4   226329.33   219151.94   1126.80 o
   5   1   1   156958.00   160331.75    501.59 o
   5   3   1    16470.39    15733.80    156.36 o
   5   3   3    87236.92    89332.30    436.36 o
   5   5   1    20843.51    20284.08    278.68 o
   5   5   3    84227.56    87914.29    520.91 o
   5   5   5    82409.57    89943.47    944.09 o
   6   2   0    19254.58    18109.30    242.67 o
   6   2   2    24585.33    23272.28    283.51 o
   6   4   2    17404.47    17193.98    181.62 o
   6   4   4       37.91      298.67    220.93 <
   6   6   0    15960.86    16343.66    404.08 o
   6   6   2    12173.86    11965.55    298.01 o
   6   6   4     8311.80     8144.60    251.23 o
   6   6   6     6285.50     6860.55    570.32 o
   7   1   1     4415.93     5059.11    177.22 o
   7   3   1    47579.68    47445.18    287.25 o
   7   3   3      388.32     1616.97    206.21 o
   7   5   1    49428.63    51728.85    307.01 o
   7   5   3     2061.48     2824.60    172.39 o
   7   5   5     3869.93     4521.73    325.02 o
   7   7   1       85.30      486.65    297.57 <
   7   7   3    14992.12    15081.35    392.66 o
   7   7   5    18317.32    17666.13    413.30 o
   7   7   7      492.48     1607.97   1069.05 <
   8   0   0   419458.66   445847.88   1979.97 o
   8   2   2    13219.67    14357.74    310.75 o
   8   4   0   125284.78   123008.51    678.81 o
   8   4   2      127.18        5.49    187.33 <
   8   4   4   255285.33   271619.34   1073.23 o
   8   6   2     8072.15     7578.01    231.03 o
   8   6   4       81.51     1112.53    241.13 o
   8   6   6     7488.60     7980.77    417.25 o
   8   8   0   163777.16   172308.94   1425.91 o
   8   8   2      280.90     1049.51    433.51 o
   8   8   4    45827.52    44232.75    673.76 o
   8   8   6      184.58      290.54    503.12 <
   8   8   8    73661.51    76787.86   1570.42 o
   9   1   1    11220.37    10866.42    246.40 o
   9   3   1    51336.07    52687.00    375.75 o
   9   3   3     4324.27     4048.91    312.28 o
   9   5   1    51669.92    54279.59    442.29 o
   9   5   3     6180.38     5759.66    264.63 o
   9   5   5     8367.33     8990.31    406.27 o
   9   7   1     2202.26     2005.02    287.91 o
   9   7   3    20692.98    21197.65    380.80 o
   9   7   5    21379.34    22239.47    522.89 o
   9   7   7      247.17     1393.41    638.18 o
   9   9   1     5010.34     3818.98    639.94 o
   9   9   3    22683.13    23437.65    737.66 o
   9   9   5    23818.40    26456.82    738.54 o
   9   9   7     1104.86      686.27    885.90 <
   9   9   9     2492.69     4216.69    677.93 o
  10   2   0     9779.96     9073.32    363.89 o
  10   2   2     6334.39     5516.99    392.44 o
  10   4   2     6405.22     6996.05    304.60 o
  10   4   4       15.36      704.50    395.51 <
  10   6   0     4106.99     3684.36    467.33 o
  10   6   2     3562.75     3751.34    357.74 o
  10   6   4     7270.58     7614.68    414.18 o
  10   6   6     2175.20     2775.84    606.12 o
  10   8   2     5030.14     3878.06    465.57 o
  10   8   4       34.99     -470.84    502.68 <
  10   8   6     2389.41     3142.59    483.14 o
  10   8   8       80.66      671.34   1185.00 <
  10  10   0     5588.31     5466.04   1186.54 o
  10  10   2     1430.11     2430.84    720.97 o
  10  10   4     1574.16      920.82    712.63 <
  10  10   6      976.74     1412.08   1536.38 <
  10  10   8     3136.22     2556.24    477.43 o
  11   1   1    17496.19    17582.03    435.92 o
  11   3   1        3.34      134.40    287.91 <
  11   3   3     9627.04    10010.60    500.05 o
  11   5   1      336.30      114.42    410.89 <
  11   5   3    11936.37    12178.35    405.84 o
  11   5   5    13070.62    15356.30    695.06 o
  11   7   1     6689.96     6519.72    507.07 o
  11   7   3      464.59      971.55    489.95 <
  11   7   5       14.56     -283.07    449.54 <
  11   7   7     2391.68     2299.51    845.49 o
  11   9   1     9377.44     8924.64    593.38 o
  11   9   3       82.04     1545.82    599.31 o
  11   9   5      258.71      707.58    661.68 <
  11   9   7     4548.20     4438.06    389.80 o
  11   9   9     5043.60     4946.01    576.25 o
  11  11   1      333.83     1249.35   1156.45 <
  11  11   3     1821.01     1449.85    359.50 o
  11  11   5     2688.86     3018.07    568.78 o
  11  11   7      704.84     1350.37    676.83 <
  12   0   0    45611.07    44177.85   1300.30 o
  12   2   2     5130.54     5927.44    577.57 o
  12   4   0   108346.60   112143.85   1155.36 o
  12   4   2      108.36      200.28    426.48 <
  12   4   4    28525.36    25053.08    734.37 o
  12   6   2     4149.72     3742.78    550.78 o
  12   6   4       71.62     -433.51    662.34 <
  12   6   6     2468.13     1643.55   1044.89 <
  12   8   0    17980.76    16374.40    879.53 o
  12   8   2      248.93      486.43    593.82 <
  12   8   4    50683.82    51154.36    799.15 o
  12   8   6      165.63      679.69    323.48 o
  12   8   8     7219.99     6624.03    699.67 o
  12  10   2     2089.39     2006.34    230.37 o
  12  10   4       31.57      585.69    289.00 o
  12  10   6     2307.50     2129.32    432.85 o
  12  12   0    24933.96    23603.23    854.93 o
  12  12   2      226.98     1323.80    549.90 o
  13   1   1    23385.28    23188.61    989.11 o
  13   3   1     2273.95     2579.73    506.42 o
  13   3   3    15658.03    14494.56    783.12 o
  13   5   1     3125.09     2830.09    601.73 o
  13   5   3    15976.62    17411.39    751.28 o
  13   5   5    16683.64    17794.38   1032.38 o
  13   7   1    10755.77    11246.34    692.20 o
  13   7   3      445.86      879.97    560.22 <
  13   7   5      686.31      743.59    293.40 o
  13   7   7     5382.45     4626.48    552.97 o
  13   9   1    11687.99    11210.10    303.94 o
  13   9   3     1075.15      662.78    288.56 o
  13   9   5     1543.21     2737.63    389.80 o
  13  11   1       84.38      680.56    335.12 o
  14   2   0     2883.03     2434.79   1064.00 o
  14   2   2     1470.98      552.75    956.83 <
  14   4   2     3442.81     3288.85    532.55 o
  14   4   4        4.34     -681.00    731.51 <
  14   6   0     3919.78     3599.37    913.57 o
  14   6   2     1004.15     1128.56    653.99 <
  14   6   4     1410.27     1737.76    673.76 o
  14   6   6      705.55       91.36    466.23 <
  14   8   2     1764.90     1792.22    296.47 o
  14   8   4       10.11     -193.47    361.04 <
  14   8   6     2268.29     3022.90    588.11 o
  14  10   0      704.30     1408.78    504.22 o
  15   1   1       73.95      328.97    284.83 <
  15   3   1     3289.52     2765.96    282.85 o
  15   3   3      392.17     1342.90    391.56 o
  15   5   1     3975.54     4118.96    270.56 o
  15   5   3       68.18      157.24    301.52 <
  15   5   5        1.70     -724.27    419.45 <
  15   7   1      311.68      143.40    332.27 <
  15   7   3     1362.87     1915.42    418.57 o
  16   0   0    35102.89    35807.94   1906.42 o
  16   2   2     2064.83     3364.83    474.13 o
  16   4   0     7096.98     6943.12    648.28 o
  16   4   2       53.52    -1080.91    422.53 <
  16   4   4    24789.07    22890.38    959.03 o
  16   6   2     1522.04      590.96    446.02 <
  17   1   1      753.34     2734.78    539.14 o
